# Supplementary material for: Albumin-mediated incorporation of water-insoluble therapeutics in layer-by-layer assembled thin films and microcapsules
Source: Royal Society of Chemistry journal article supplement (doi:10.1039/c3tb20592d), 2013-01-01
Supplement: c3tb20592d.pdf [file c3tb20592d.pdf]

## Supporting Information

# Albumin-Mediated Incorporation of Water-Insoluble Therapeutics in Layer-by-Layer Assembled Thin Films and Microcapsules

*Vaishakhi Mohanta and Satish Patil*

Solid State and Structural Chemistry Unit,  
Indian Institute of Science, Bangalore-560012

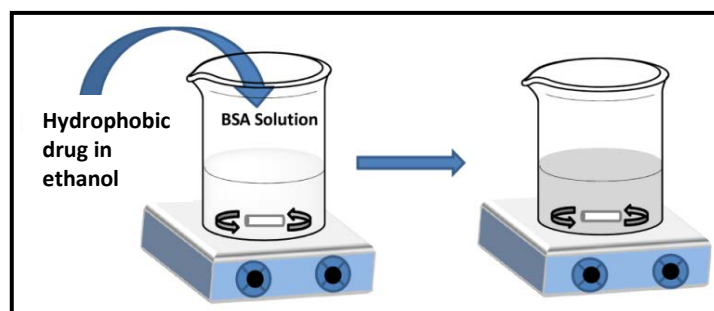

**Fig. S1.** Schematic representation of preparation of pyrene-BSA conjugates.

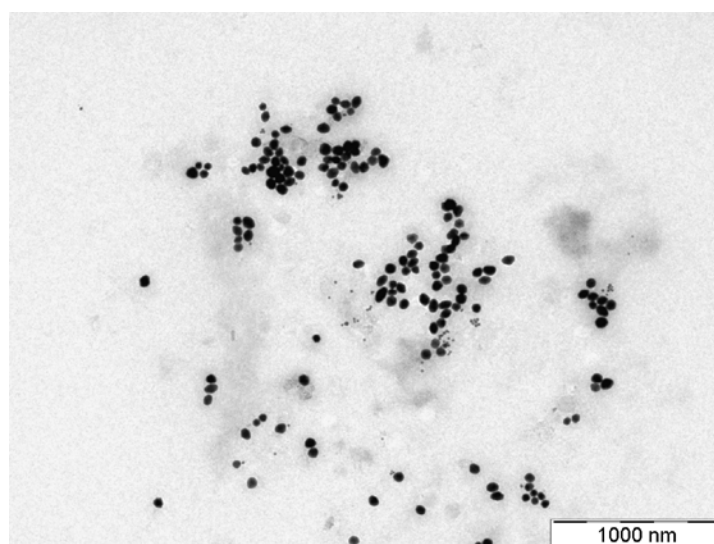

**Fig. S2.** Transmission Electron Microscopic (TEM) image of drop casted PyB.

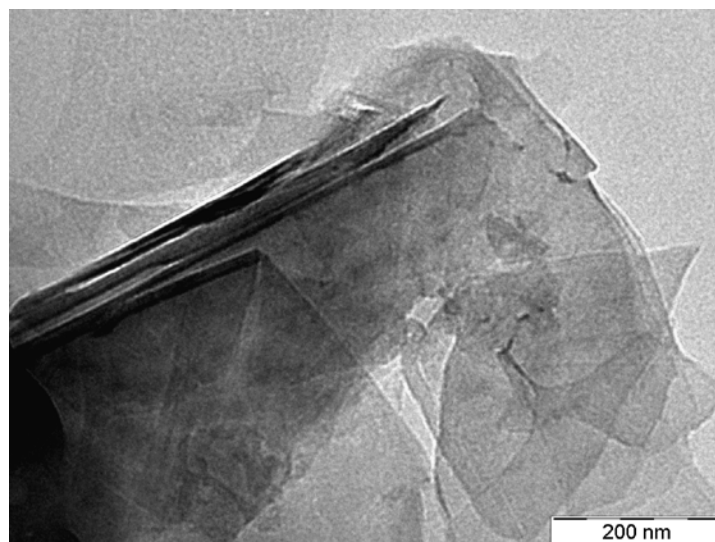

**Fig. S3.** Transmission Electron Microscopic (TEM) image of drop casted CuB.

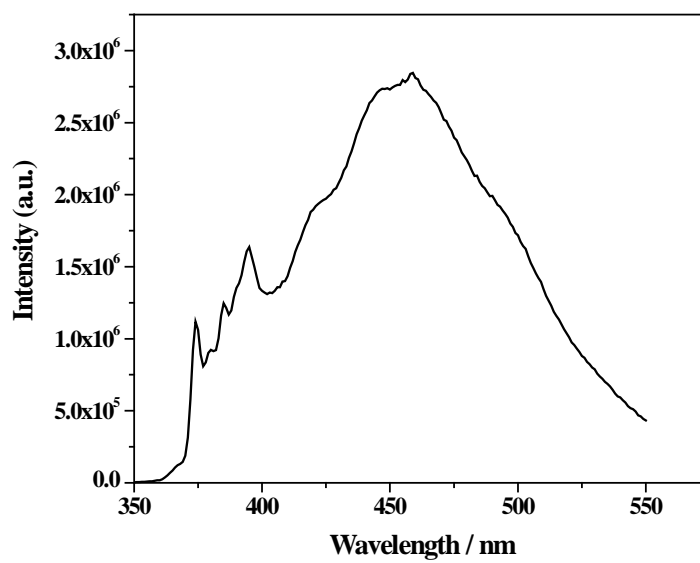

**Fig. S4.** Fluorescence spectra of (PyB/CH)<sub>10</sub>.

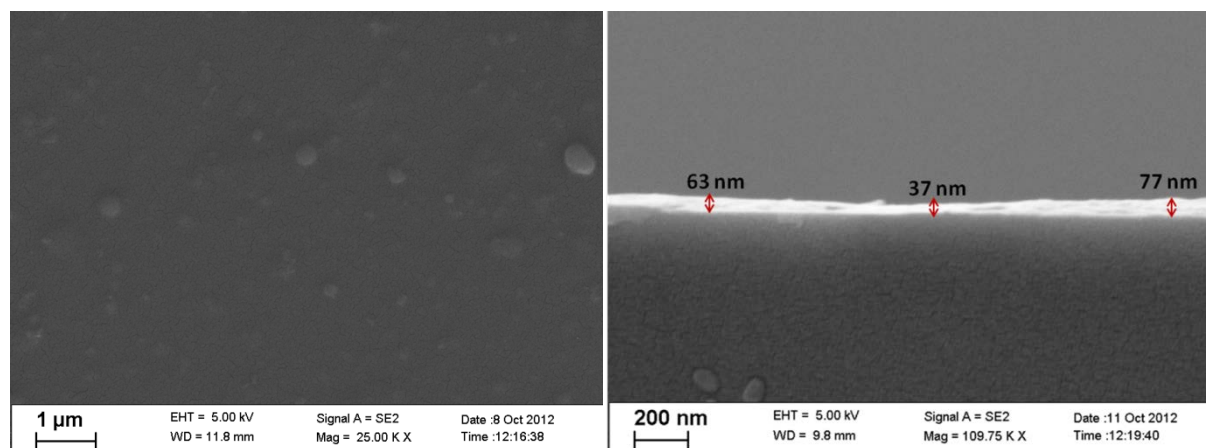

**Fig. S5.** SEM image of surface (left) and cross-section (right) of 20-bilayer film of CuB/CH.

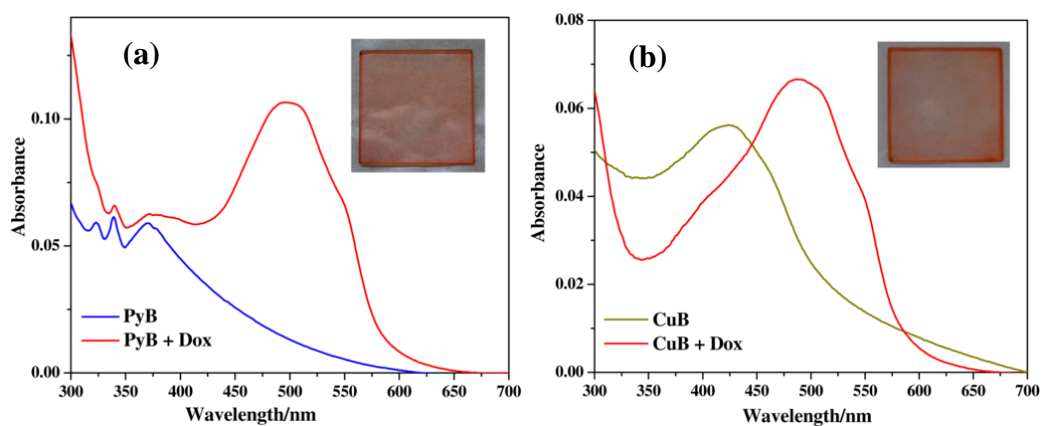

**Fig. S6** UV-visible absorbance spectra of (PyB/CH)<sub>10</sub> (a) and (CuB/CH)<sub>10</sub> (b) film before and after loading of Doxorubicin. The inset shows the photographic image of the films after Dox loading, the red coloration confirms the loading of Dox.

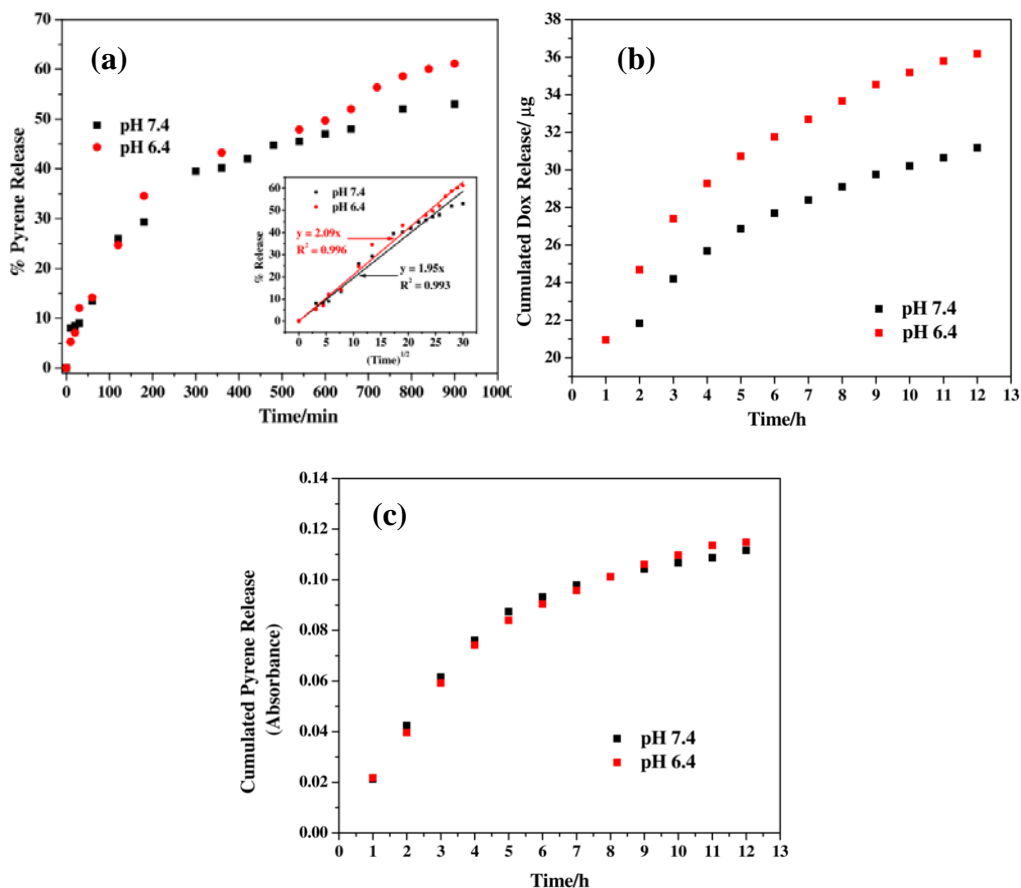

**Fig. S7** (a) Release profile of Pyrene at different pH from  $(\text{PyB}/\text{CH})_{10}$  film post-loaded with Doxorubicin. (b) and (c) are cumulated amount of Doxorubicin and Pyrene, respectively, released in the media.

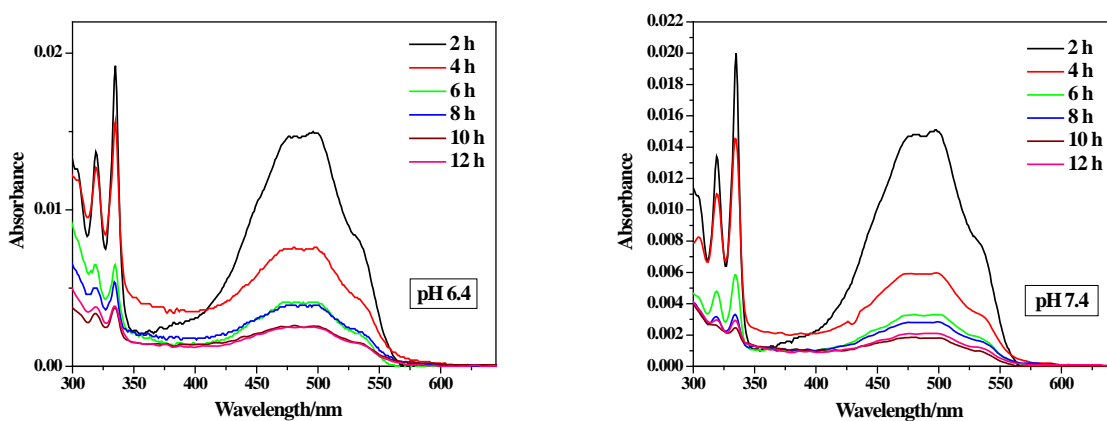

**Fig. S8.** UV-vis absorbance spectra of release media (PBS of pH 6.4 and pH 7.4) after release experiment has been conducted with Dox loaded  $(\text{PyB}/\text{CH})_{10}$  thin films.

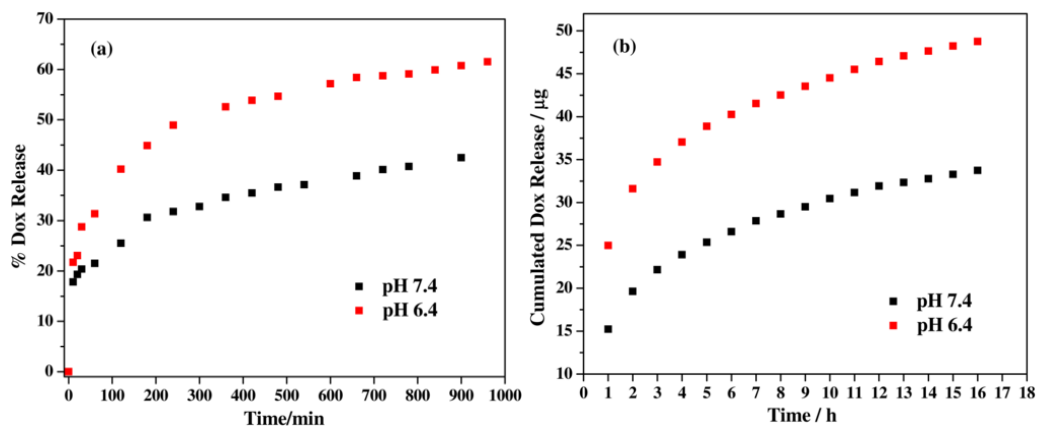

**Fig. S9** (a) Release profile of Doxorubicin for  $(\text{CuB}/\text{CH})_{10}$  films post-loaded with Doxorubicin at pH 7.4 and pH 6.4. (b) Cumulated amount of Doxorubicin in the medium at pH 7.4 and pH 6.4.

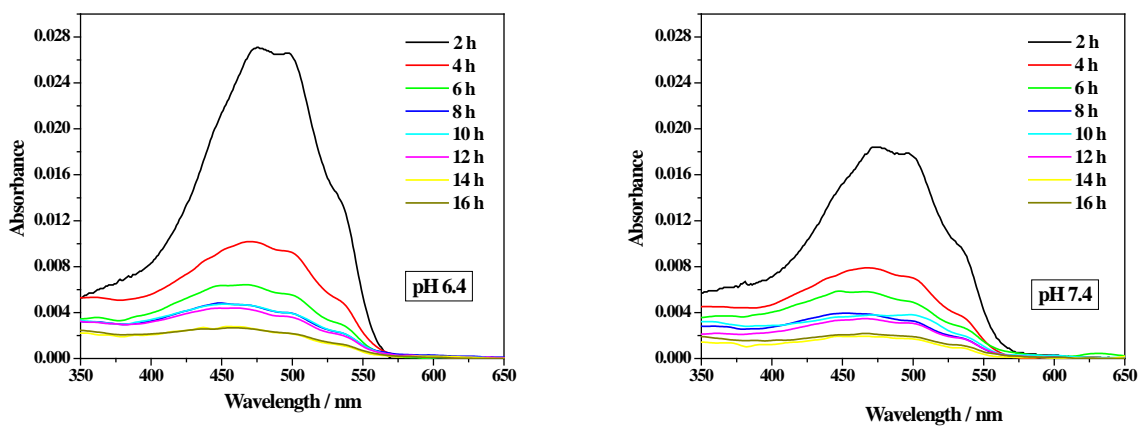

**Fig. S10.** UV-vis absorbance spectra of release media (PBS of pH 6.4 and pH 7.4) after release experiment has been conducted with Dox loaded  $(\text{CuB}/\text{CH})_{10}$  thin films.

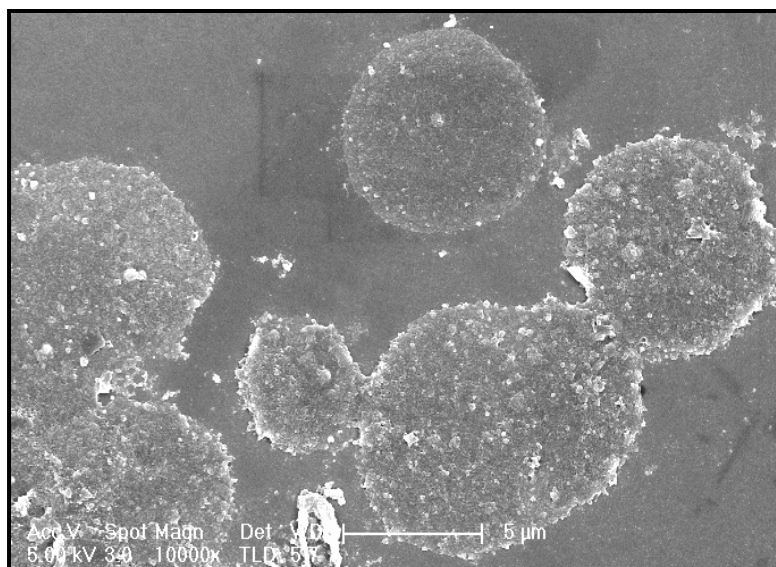

**Fig. S11.** FESEM image of microcapsules of PSS/(CH/PyB)<sub>5</sub>/PDDAC.

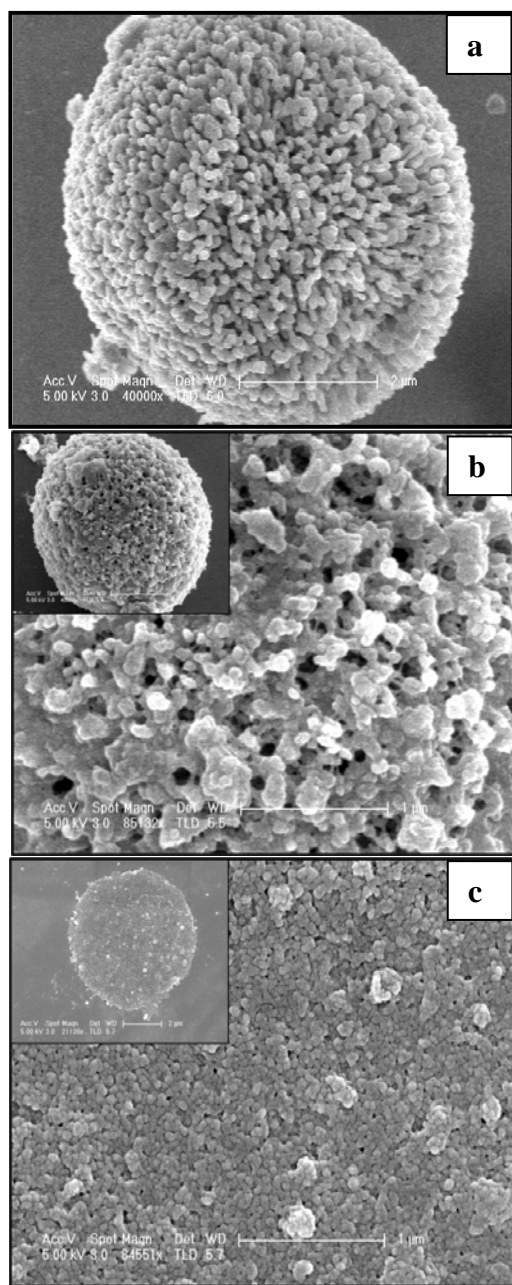

**Fig. S12.** FESEM image showing the surface morphology of (a) bare CaCO<sub>3</sub> microparticle (b) CaCO<sub>3</sub> microparticles coated with PSS(CH/PyB)<sub>5</sub>/PDDAC and (c) microcapsule of PSS/(CH/PyB)<sub>5</sub>/PDDAC formed after core dissolution.



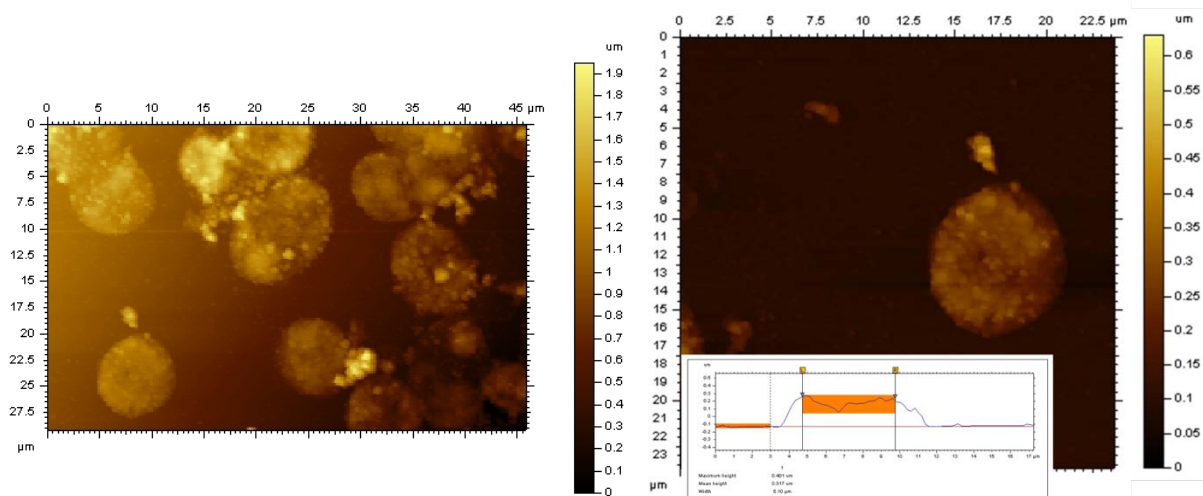

**Fig. S13.** AFM image of microcapsule of PSS/(CH/PyB)<sub>5</sub>/PDDAC. Thickness of the shell of the microcapsule as determined from height profile is 158 nm.

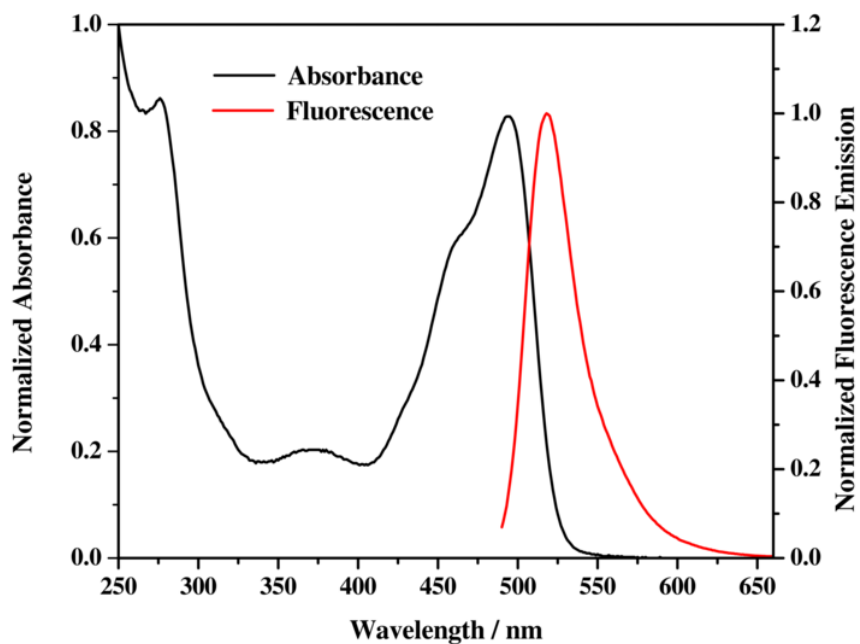

**Fig. S14:** UV-visible and Fluorescence Emission Spectra of FITC-BSA.



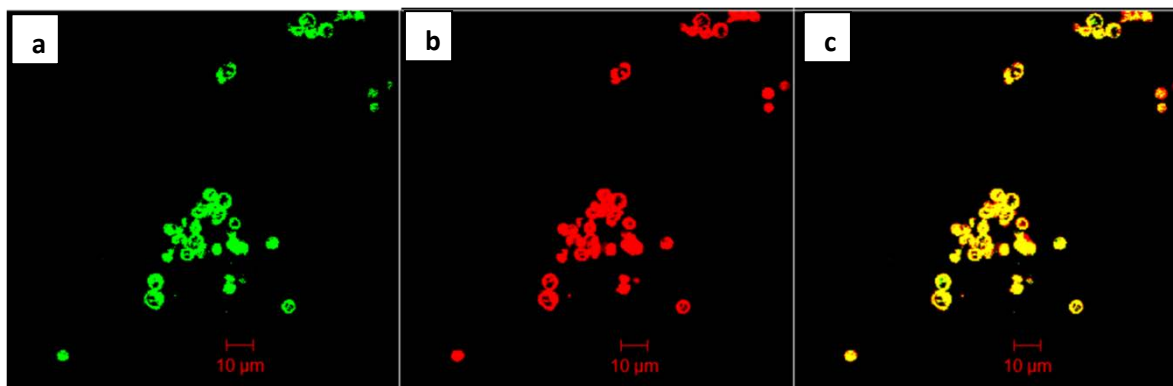

**Fig. S15:** Confocal Laser Scanning micrograph of FITC-BSA encapsulated microcapsules of CH/PyB after loading with hydrophilic dye, Rhodamine B. (a) CLSM image showing fluorescence from FITC (excited at 488 nm). (b) CLSM image showing fluorescence from Rhodamine B (excited at 543 nm). (c) Superposition of images (a) and (b).

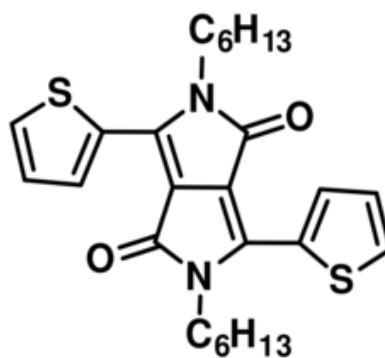

**Fig. S16:** Structure of TDPP.
